# Supplementary material for: Mutations in an avian IgY-Fc fragment reveal the locations of monocyte Fc receptor binding sites
Source: PubMed Central journal article supplement (PMC2795851; doi:10.1016/j.dci.2009.08.012), 2010-02
Supplement: mmc1.pdf [file mmc1.pdf]

Cu3 →

Chicken SQS-PAVRSGS-TYSLSSRVNVSGTDWREGKSYSCRVRHPATNTVVEDHVKGCP-DGAQS 346  
Duck TMTRPQREAGSKTYMATSQTNVSREDWKAGKAFTCRVKHPATGGTAQGHARFCPGSGAQ  
Anole YTEPPRQDAVGYTFSTTSSANISQADWLEGTIYTKVTHAGSQTMRARAKKCEDDS-TS  
Gecko HTENPRKDATGDTFSTTSTANVTQIDWKEGKTYTCQVIHQG--HKVEKHATKCRGDSGNC  
Axolotl QTSPQKDGQG-TFSTTSQINVTKSDWASGDKYTCCKVEHPATSSRAEDTIHNCADSQ---  
Newt YTSPSIKREG-TFSTTSQVNIKSDWILGERYTCKVDHPATNTSLHDSIRNCPESP---  
Frog ASVPTPSKTEDGTYSSSQLRILKGMWNKGTQYSCIVTHTSSNTTTIANISQTEQC---  
. . \* : \* . : \* \* : \* \* . \* .

AB helix

Chicken CSP-IQLYAIPSPGELYISDAKLRCLVVNLPDSSLSVTWTREKSGNLRPDPMLVQE 405  
Duck CSP-IQIFVPPSPGSLYIRQDAKVHCLVVNLPDASLSISWTREKSGALRPDPMLVTEH  
Anole QCDGIYVYLKSPNDLYLNRDPKVCVGNLESEEGLKVSWSRDKKASLDPKPMSVSEE  
Gecko TANGIKVSI LPPTPADLYMNGEPRLICVVTGLESNVGMKVRWSKEKPGTLNPEPELEPAQD  
Axolotl TPYQPKVFLIAPKARDLYIANQPVVICKITKMENSDSL SVTWKRREGPEEA AVISEQYID  
Newt SGVQLKVSMI PPKAKDLYVTQPSIVCQVTKMESADGLSITWKQEDGSP LVGLPHETEVL  
Frog -HDNLQVYPLTPTFHDL YFSR NAKVTCLVSSMKT IENFDIS WEREKAGNLEFVTEDPVLH  
: . \* . \* . : . : \* : : . . . : \* : .

Cu4 →

Chicken FNGTYSASSAVPVSTQDWLSGERFTCTVQHEELPLPLSKSVYRNT-GPTTPPLIYPFAPR 464  
Duck FNGTFTASSSLAISTQDWLAGERFTCTVQHEDLPVPLGKSI AKHA-GKVTAPYIFTFPPH  
Anole LNGTYTVVSALPIL TREWDSEETFTCTVEYPGVPTPIVKKITK LK-GKVTTPSVYLFRPH  
Gecko SDGTFTLKSP LIISKQDWLAGEIYTCTLEHSSGIAPYSKTI AKKT-GKRTQAQVYLFRPH  
Axolotl SDGTF TAMS YLNITKNEWERGDEFTCKVKHFDL PFP LRSRSVSKPT-GRSFAPTMYVFAPH  
Newt PDGTLGADSTLTITTD AWKQGSFAFCKVEHPDLSSPVTRTIRKPK-EREIGPSMYLFPFH  
Frog DNGTYSVASILSVCAEDWESGDKFSCTVRSQDLPSPVKKTIFKQNEGTPKAPDVYLLPPS  
: \* \* \* : : \* . : \* : . : : : \* : . : : : \*

CC' loop

Chicken PEELSLS---RVTL SCLVRGFRPRDIEIRWLRDRAVPATEFVTTAVLPEERTANGAGGD 521  
Duck AEELSLSA---EVTLTCLVRGFQPEHVEVQWLRNENSVPAAEFVTT PPLKE-----PNGD  
Anole REELIFQSHS QLTLTCLVKLNLPKDVSVQWLKDNNA LTEDNHITTPVLKD-----SI  
Gecko NEELKSR-DPNV SITCLVQGFNPEDISIKWLENINAVAGNNHVTTQVQMD-----SD  
Axolotl EMELANY--DFVSLTCLVRSFSPDDIYIQWKQKSVI PSDKYVSM EPRQEAG-----TAG  
Newt QHELDQH--ELVSLTCLVKGFSPDDIYVQWKRNTVLPDNSSRN TALVLESG-----TNG  
Frog AQELIQ--EMVTLT C FVTG FNPKEIFIQW MQGVSISEDKFINTVPMKS-----DG  
\* \* : : \* \* : \* : \* : \* : . . . .

FG loop

Chicken GDTFFVYSKMSVETAKWNGGTVFACMAVHEALPMRFSQRTLQKQAGK----- 568  
Duck G-TFFLYSKMTVPKASWQGGVSYACMVVHEGLPMRFTQRPLQKTPGK-----  
Anole EDSYFVYSKLLISRADWDRGSSYTCMVVHEGLAMKFTQRTVEKSQGKK-----  
Gecko QDSFFVYSKLTVPKANWNDGHSFTCHVVHEGFMSMYTQRTIEKTQGKK-----  
Axolotl LGTYFSYMLTIQKSDWDKRETFTCVAAHSAVPKNLMTRRIQKPLGK-----  
Newt PDTYFMYSLLTISKSNWENRDTYSCIAFHSALPKNQMQRSIQKARGN-----  
Frog EQTYFIYSKLAIPA AKWNQGDVFTCVVGHEALPLYITQQSIDKSSGKSSLVNVLVMS  
: \* \* \* : : : \* : : \* . \* . . . : : \* \* :

Supplementary Fig. 1. Amino acid sequences of epsilon (IgY) heavy chain sequences from birds, reptiles and amphibians, aligned using ClustalW [1]. Residues in chicken IgY-Fc involved in binding to monocytes and/or CHIR-AB1, and conserved residues in other species, are highlighted. Exact matches are coloured red, similar residues are coloured yellow.

## Reference

[1] Chenna R, Sugawara H, Koike T, Lopez R, Gibson TJ, Higgins DG, Thompson JD. Multiple sequence alignment with the Clustal series of programs. *Nucleic Acids Res* 2003; 31:3497-3500.
